# Supplementary material for: Different immunological characteristics of asymptomatic and symptomatic COVID-19 patients without vaccination in the acute and convalescence stages
Source: PeerJ journal article supplement (doi:10.7717/peerj.18451), 2025-01-29
Supplement: fig3_Statistical_P-value_with_cluster_id_95487_staffFileAS.xlsx [file fig3_Statistical_P-value_with_cluster_id_95487_staffFileAS.xlsx]

## Sheet: cluster to cell type
Cluster	Celltype	Subtype
cluster8	CD4+T	CD25-CD45RA-CXCR3+CCR6-
cluster9	CD4+T	CD25+CD127-
cluster10	CD4+T	CXCR3+
cluster11	CD4+T	CXCR3-
cluster12	CD4+T	CD27+PD1+
cluster13	CD4+T	CD127+GB+
cluster14	CD4+T	CCR7+
cluster15	CD4+T	CCR7dim
cluster16	CD8+T	CD45RA+CCR7+Tbet+
cluster17	CD8+T	CD45RO+CD27+PD1+
cluster18	CD8+T	GB+Tbet-CCR7+
cluster19	CD8+T	CD127+TCR_Va7.2+

## Sheet: fig3_Statistical P-value with c
Cluster	.y.	group1	group2	p	p.adj	p.format	p.signif	method
cluster15	Freq	control	acute	0.0539461	1	0.0539	ns	Wilcoxon
cluster15	Freq	control	convalescence	0.839161	1	0.8392	ns	Wilcoxon
cluster15	Freq	acute	convalescence	0.028306	1	0.0283	*	Wilcoxon
cluster10	Freq	control	acute	0.141858	1	0.1419	ns	Wilcoxon
cluster10	Freq	control	convalescence	0.103496	1	0.1035	ns	Wilcoxon
cluster10	Freq	acute	convalescence	0.00219376	0.19	0.0022	**	Wilcoxon
cluster18	Freq	control	acute	0.635365	1	0.6354	ns	Wilcoxon
cluster18	Freq	control	convalescence	0.945055	1	0.9451	ns	Wilcoxon
cluster18	Freq	acute	convalescence	0.364166	1	0.3642	ns	Wilcoxon
cluster13	Freq	control	acute	0.373626	1	0.3736	ns	Wilcoxon
cluster13	Freq	control	convalescence	0.839161	1	0.8392	ns	Wilcoxon
cluster13	Freq	acute	convalescence	0.00248754	0.21	0.0025	**	Wilcoxon
cluster8	Freq	control	acute	0.013986	1	0.014	*	Wilcoxon
cluster8	Freq	control	convalescence	0.0889808	1	0.089	ns	Wilcoxon
cluster8	Freq	acute	convalescence	0.241145	1	0.2411	ns	Wilcoxon
cluster12	Freq	control	acute	0.141858	1	0.1419	ns	Wilcoxon
cluster12	Freq	control	convalescence	1	1	1	ns	Wilcoxon
cluster12	Freq	acute	convalescence	0.217563	1	0.2176	ns	Wilcoxon
cluster14	Freq	control	acute	0.733267	1	0.7333	ns	Wilcoxon
cluster14	Freq	control	convalescence	0.288314	1	0.2883	ns	Wilcoxon
cluster14	Freq	acute	convalescence	0.272856	1	0.2729	ns	Wilcoxon
cluster9	Freq	control	acute	0.945055	1	0.9451	ns	Wilcoxon
cluster9	Freq	control	convalescence	0.839161	1	0.8392	ns	Wilcoxon
cluster9	Freq	acute	convalescence	0.578742	1	0.5787	ns	Wilcoxon
cluster17	Freq	control	acute	0.178631	1	0.1786	ns	Wilcoxon
cluster17	Freq	control	convalescence	0.733267	1	0.7333	ns	Wilcoxon
cluster17	Freq	acute	convalescence	0.0538124	1	0.0538	ns	Wilcoxon
cluster11	Freq	control	acute	0.303696	1	0.3037	ns	Wilcoxon
cluster11	Freq	control	convalescence	0.303696	1	0.3037	ns	Wilcoxon
cluster11	Freq	acute	convalescence	0.650025	1	0.65	ns	Wilcoxon
cluster16	Freq	control	acute	0.23976	1	0.2398	ns	Wilcoxon
cluster16	Freq	control	convalescence	0.453546	1	0.4535	ns	Wilcoxon
cluster16	Freq	acute	convalescence	0.0288056	1	0.0288	*	Wilcoxon
cluster19	Freq	control	acute	0.0539461	1	0.0539	ns	Wilcoxon
cluster19	Freq	control	convalescence	0.035964	1	0.036	*	Wilcoxon
cluster19	Freq	acute	convalescence	0.684211	1	0.6842	ns	Wilcoxon
