# Supplementary material for: Different immunological characteristics of asymptomatic and symptomatic COVID-19 patients without vaccination in the acute and convalescence stages
Source: PeerJ journal article supplement (doi:10.7717/peerj.18451), 2025-01-29
Supplement: fig3statisticalTable_celltype_95487_staffFileAS.xlsx [file fig3statisticalTable_celltype_95487_staffFileAS.xlsx]

## Sheet: fig3statistical table_celltype
Sample	Cluster	Freq	Group	condition	clinical_manifestation
sample01	CD4+ T	0.27425	acute	moderate_1	symptomatic_1
sample01	Ki67+ T	0.0135833	acute	moderate_1	symptomatic_1
sample01	OX40+ T	0.00025	acute	moderate_1	symptomatic_1
sample01	gdT	0.0295833	acute	moderate_1	symptomatic_1
sample01	CD8+ T	0.06075	acute	moderate_1	symptomatic_1
sample02	CD4+ T	0.1925	convalescence	moderate_2	symptomatic_2
sample02	Ki67+ T	0.0228333	convalescence	moderate_2	symptomatic_2
sample02	gdT	0.0123333	convalescence	moderate_2	symptomatic_2
sample02	OX40+ T	0.000333333	convalescence	moderate_2	symptomatic_2
sample02	CD8+ T	0.109833	convalescence	moderate_2	symptomatic_2
sample03	Ki67+ T	0.00525	acute	asymptomatic_1	asymptomatic_1
sample03	gdT	0.0245	acute	asymptomatic_1	asymptomatic_1
sample03	CD4+ T	0.28	acute	asymptomatic_1	asymptomatic_1
sample03	OX40+ T	0.00075	acute	asymptomatic_1	asymptomatic_1
sample03	CD8+ T	0.148333	acute	asymptomatic_1	asymptomatic_1
sample04	Ki67+ T	0.0104167	convalescence	asymptomatic_2	asymptomatic_2
sample04	gdT	0.0278333	convalescence	asymptomatic_2	asymptomatic_2
sample04	CD4+ T	0.3585	convalescence	asymptomatic_2	asymptomatic_2
sample04	OX40+ T	0.000583333	convalescence	asymptomatic_2	asymptomatic_2
sample04	CD8+ T	0.197917	convalescence	asymptomatic_2	asymptomatic_2
sample05	Ki67+ T	0.0251667	acute	severe_1	symptomatic_1
sample05	OX40+ T	0.00141667	acute	severe_1	symptomatic_1
sample05	gdT	0.0746667	acute	severe_1	symptomatic_1
sample05	CD4+ T	0.21125	acute	severe_1	symptomatic_1
sample05	CD8+ T	0.31375	acute	severe_1	symptomatic_1
sample06	CD4+ T	0.321583	convalescence	severe_2	symptomatic_2
sample06	Ki67+ T	0.0101667	convalescence	severe_2	symptomatic_2
sample06	OX40+ T	0.000166667	convalescence	severe_2	symptomatic_2
sample06	gdT	0.0444167	convalescence	severe_2	symptomatic_2
sample06	CD8+ T	0.208667	convalescence	severe_2	symptomatic_2
sample07	CD4+ T	0.182417	acute	moderate_1	symptomatic_1
sample07	gdT	0.0161667	acute	moderate_1	symptomatic_1
sample07	Ki67+ T	0.0225833	acute	moderate_1	symptomatic_1
sample07	OX40+ T	0.000666667	acute	moderate_1	symptomatic_1
sample07	CD8+ T	0.112333	acute	moderate_1	symptomatic_1
sample08	CD4+ T	0.193167	convalescence	moderate_2	symptomatic_2
sample08	Ki67+ T	0.0221667	convalescence	moderate_2	symptomatic_2
sample08	gdT	0.0115	convalescence	moderate_2	symptomatic_2
sample08	CD8+ T	0.110667	convalescence	moderate_2	symptomatic_2
sample08	OX40+ T	0.000416667	convalescence	moderate_2	symptomatic_2
sample09	CD4+ T	0.31275	acute	asymptomatic_1	asymptomatic_1
sample09	CD8+ T	0.24575	acute	asymptomatic_1	asymptomatic_1
sample09	OX40+ T	0.00116667	acute	asymptomatic_1	asymptomatic_1
sample09	Ki67+ T	0.00366667	acute	asymptomatic_1	asymptomatic_1
sample09	gdT	0.0408333	acute	asymptomatic_1	asymptomatic_1
sample10	CD4+ T	0.262583	convalescence	asymptomatic_2	asymptomatic_2
sample10	CD8+ T	0.324	convalescence	asymptomatic_2	asymptomatic_2
sample10	OX40+ T	0.000583333	convalescence	asymptomatic_2	asymptomatic_2
sample10	Ki67+ T	0.0108333	convalescence	asymptomatic_2	asymptomatic_2
sample10	gdT	0.0950833	convalescence	asymptomatic_2	asymptomatic_2
sample11	CD4+ T	0.149417	acute	moderate_1	symptomatic_1
sample11	gdT	0.0154167	acute	moderate_1	symptomatic_1
sample11	CD8+ T	0.076	acute	moderate_1	symptomatic_1
sample11	Ki67+ T	0.00883333	acute	moderate_1	symptomatic_1
sample11	OX40+ T	8.33e-05	acute	moderate_1	symptomatic_1
sample12	gdT	0.0375	convalescence	moderate_2	symptomatic_2
sample12	CD4+ T	0.15575	convalescence	moderate_2	symptomatic_2
sample12	CD8+ T	0.196	convalescence	moderate_2	symptomatic_2
sample12	Ki67+ T	0.0174167	convalescence	moderate_2	symptomatic_2
sample12	OX40+ T	0.000166667	convalescence	moderate_2	symptomatic_2
sample13	gdT	0.023	acute	asymptomatic_1	asymptomatic_1
sample13	CD4+ T	0.188667	acute	asymptomatic_1	asymptomatic_1
sample13	OX40+ T	0.000166667	acute	asymptomatic_1	asymptomatic_1
sample13	CD8+ T	0.08725	acute	asymptomatic_1	asymptomatic_1
sample13	Ki67+ T	0.00725	acute	asymptomatic_1	asymptomatic_1
sample14	OX40+ T	0.000583333	convalescence	asymptomatic_2	asymptomatic_2
sample14	gdT	0.0498333	convalescence	asymptomatic_2	asymptomatic_2
sample14	CD4+ T	0.38875	convalescence	asymptomatic_2	asymptomatic_2
sample14	CD8+ T	0.20525	convalescence	asymptomatic_2	asymptomatic_2
sample14	Ki67+ T	0.00641667	convalescence	asymptomatic_2	asymptomatic_2
sample15	OX40+ T	0.000166667	acute	severe_1	symptomatic_1
sample15	CD4+ T	0.222583	acute	severe_1	symptomatic_1
sample15	gdT	0.00641667	acute	severe_1	symptomatic_1
sample15	Ki67+ T	0.0271667	acute	severe_1	symptomatic_1
sample15	CD8+ T	0.0901667	acute	severe_1	symptomatic_1
sample16	Ki67+ T	0.0166667	convalescence	severe_2	symptomatic_2
sample16	OX40+ T	0.000666667	convalescence	severe_2	symptomatic_2
sample16	gdT	0.00658333	convalescence	severe_2	symptomatic_2
sample16	CD4+ T	0.359833	convalescence	severe_2	symptomatic_2
sample16	CD8+ T	0.171	convalescence	severe_2	symptomatic_2
sample17	CD4+ T	0.1115	acute	moderate_1	symptomatic_1
sample17	CD8+ T	0.14	acute	moderate_1	symptomatic_1
sample17	Ki67+ T	0.02075	acute	moderate_1	symptomatic_1
sample17	OX40+ T	0.000333333	acute	moderate_1	symptomatic_1
sample17	gdT	0.0286667	acute	moderate_1	symptomatic_1
sample18	OX40+ T	0.0005	convalescence	moderate_2	symptomatic_2
sample18	CD4+ T	0.194917	convalescence	moderate_2	symptomatic_2
sample18	CD8+ T	0.172417	convalescence	moderate_2	symptomatic_2
sample18	Ki67+ T	0.0110833	convalescence	moderate_2	symptomatic_2
sample18	gdT	0.0415833	convalescence	moderate_2	symptomatic_2
sample19	OX40+ T	0.002	acute	asymptomatic_1	asymptomatic_1
sample19	CD4+ T	0.335833	acute	asymptomatic_1	asymptomatic_1
sample19	gdT	0.0159167	acute	asymptomatic_1	asymptomatic_1
sample19	CD8+ T	0.113583	acute	asymptomatic_1	asymptomatic_1
sample19	Ki67+ T	0.00908333	acute	asymptomatic_1	asymptomatic_1
sample20	CD4+ T	0.380917	convalescence	asymptomatic_2	asymptomatic_2
sample20	OX40+ T	0.0005	convalescence	asymptomatic_2	asymptomatic_2
sample20	Ki67+ T	0.00866667	convalescence	asymptomatic_2	asymptomatic_2
sample20	gdT	0.0255	convalescence	asymptomatic_2	asymptomatic_2
sample20	CD8+ T	0.145667	convalescence	asymptomatic_2	asymptomatic_2
sample21	CD4+ T	0.317167	control	control	control
sample21	OX40+ T	0.00075	control	control	control
sample21	CD8+ T	0.19025	control	control	control
sample21	Ki67+ T	0.0118333	control	control	control
sample21	gdT	0.00758333	control	control	control
sample22	CD4+ T	0.233333	control	control	control
sample22	OX40+ T	0.00116667	control	control	control
sample22	CD8+ T	0.204333	control	control	control
sample22	Ki67+ T	0.00891667	control	control	control
sample22	gdT	0.0446667	control	control	control
sample23	OX40+ T	0.00075	control	control	control
sample23	CD4+ T	0.218	control	control	control
sample23	CD8+ T	0.174333	control	control	control
sample23	gdT	0.112417	control	control	control
sample23	Ki67+ T	0.01275	control	control	control
sample24	CD4+ T	0.289083	control	control	control
sample24	OX40+ T	0.00191667	control	control	control
sample24	Ki67+ T	0.0154167	control	control	control
sample24	gdT	0.02725	control	control	control
sample24	CD8+ T	0.151	control	control	control
