# Supplementary material for: Different immunological characteristics of asymptomatic and symptomatic COVID-19 patients without vaccination in the acute and convalescence stages
Source: PeerJ journal article supplement (doi:10.7717/peerj.18451), 2025-01-29
Supplement: fig4_Statistical_P-value_with_cluster_id_95487_staffFileAS.xlsx [file fig4_Statistical_P-value_with_cluster_id_95487_staffFileAS.xlsx]

## Sheet: cluster to cell type
Cluster	Celltype	Subtype
Cluster1	B	IgD-
Cluster2	B	IgD+
Cluster29	B	Plasma

## Sheet: fig4_Statistical P-value with c
Cluster	.y.	group1	group2	p	p.adj	p.format	p.signif	method
cluster1	Freq	control	acute	0.357442	1	0.3574	ns	Wilcoxon
cluster1	Freq	control	convalescence	0.733267	1	0.7333	ns	Wilcoxon
cluster1	Freq	acute	convalescence	0.10398	1	0.104	ns	Wilcoxon
cluster2	Freq	control	acute	0.0539461	1	0.0539	ns	Wilcoxon
cluster2	Freq	control	convalescence	0.373626	1	0.3736	ns	Wilcoxon
cluster2	Freq	acute	convalescence	0.0185434	1	0.0185	*	Wilcoxon
cluster29	Freq	control	acute	0.187812	1	0.1878	ns	Wilcoxon
cluster29	Freq	control	convalescence	0.035964	1	0.036	*	Wilcoxon
cluster29	Freq	acute	convalescence	0.00208924	0.18	0.0021	**	Wilcoxon
