# Supplementary material for: Different immunological characteristics of asymptomatic and symptomatic COVID-19 patients without vaccination in the acute and convalescence stages
Source: PeerJ journal article supplement (doi:10.7717/peerj.18451), 2025-01-29
Supplement: fig5_Statistical_P-value_with_cluster_id_95487_staffFileAS.xlsx [file fig5_Statistical_P-value_with_cluster_id_95487_staffFileAS.xlsx]

## Sheet: Cluster to Celltype
Cluster	Celltype	Subtype
Cluster23	NK	CD3-CD56+CD16-
Cluster24	NK	CD3-CD56+CD16+
Cluster25	NK	CD3+CD56+CDD16+
Cluster27	NK	CD3-CD56dimCD16-

## Sheet: fig5_Statistical P-value with c
Cluster	.y.	group1	group2	p	p.adj	p.format	p.signif	method
cluster23	Freq	control	acute	0.776819	1	0.7768	ns	Wilcoxon
cluster23	Freq	control	convalescence	0.887414	1	0.8874	ns	Wilcoxon
cluster23	Freq	acute	convalescence	0.969816	1	0.9698	ns	Wilcoxon
cluster25	Freq	control	acute	0.0759241	1	0.0759	ns	Wilcoxon
cluster25	Freq	control	convalescence	0.733267	1	0.7333	ns	Wilcoxon
cluster25	Freq	acute	convalescence	0.165494	1	0.1655	ns	Wilcoxon
cluster24	Freq	control	acute	0.118981	1	0.119	ns	Wilcoxon
cluster24	Freq	control	convalescence	0.723382	1	0.7234	ns	Wilcoxon
cluster24	Freq	acute	convalescence	0.344341	1	0.3443	ns	Wilcoxon
cluster27	Freq	control	acute	0.0539461	1	0.0539	ns	Wilcoxon
cluster27	Freq	control	convalescence	0.945055	1	0.9451	ns	Wilcoxon
cluster27	Freq	acute	convalescence	0.0185434	1	0.0185	*	Wilcoxon
