# Supplementary material for: Different immunological characteristics of asymptomatic and symptomatic COVID-19 patients without vaccination in the acute and convalescence stages
Source: PeerJ journal article supplement (doi:10.7717/peerj.18451), 2025-01-29
Supplement: fig6_Statistical_P-value_with_cluster_id_95487_staffFileAS.xlsx [file fig6_Statistical_P-value_with_cluster_id_95487_staffFileAS.xlsx]

## Sheet: Cluster to Celltype
Cluster	Celltype	Subtype
Cluster3	cDCs	CD272+CD6+CD11b-
Cluster4	cDCs	CD272-CD16-CD11bdim
Cluster5	cDCs	CD272+CD123+CD11b-
Cluster6	Classical Monocyte	CD14+CD16-GB-CXCR3+
Cluster7	Classical Monocyte	CD272-CD123+CD11b-
Cluster20	Neutrophils
Cluster28	Mast cells	CD3+CD4-CD111-CD74+CD117+

## Sheet: fig6_Statistical P-value with c
Cluster	.y.	group1	group2	p	p.adj	p.format	p.signif	method
cluster28	Freq	control	acute	0.373626	1	0.3736	ns	Wilcoxon
cluster28	Freq	control	convalescence	0.839161	1	0.8392	ns	Wilcoxon
cluster28	Freq	acute	convalescence	0.00388621	0.33	0.0039	**	Wilcoxon
cluster3	Freq	control	acute	0.0539461	1	0.0539	ns	Wilcoxon
cluster3	Freq	control	convalescence	0.635365	1	0.6354	ns	Wilcoxon
cluster3	Freq	acute	convalescence	0.00519604	0.43	0.0052	**	Wilcoxon
cluster7	Freq	control	acute	0.0889808	1	0.089	ns	Wilcoxon
cluster7	Freq	control	convalescence	0.620233	1	0.6202	ns	Wilcoxon
cluster7	Freq	acute	convalescence	0.0961785	1	0.0962	ns	Wilcoxon
cluster20	Freq	control	acute	0.00799201	0.65	0.008	**	Wilcoxon
cluster20	Freq	control	convalescence	0.013986	1	0.014	*	Wilcoxon
cluster20	Freq	acute	convalescence	0.130425	1	0.1304	ns	Wilcoxon
cluster5	Freq	control	acute	0.479017	1	0.479	ns	Wilcoxon
cluster5	Freq	control	convalescence	0.635365	1	0.6354	ns	Wilcoxon
cluster5	Freq	acute	convalescence	0.853428	1	0.8534	ns	Wilcoxon
cluster6	Freq	control	acute	0.141858	1	0.1419	ns	Wilcoxon
cluster6	Freq	control	convalescence	0.945055	1	0.9451	ns	Wilcoxon
cluster6	Freq	acute	convalescence	0.035463	1	0.0355	*	Wilcoxon
cluster4	Freq	control	acute	0.187812	1	0.1878	ns	Wilcoxon
cluster4	Freq	control	convalescence	0.23976	1	0.2398	ns	Wilcoxon
cluster4	Freq	acute	convalescence	0.684211	1	0.6842	ns	Wilcoxon
