# Supplementary material for: Different immunological characteristics of asymptomatic and symptomatic COVID-19 patients without vaccination in the acute and convalescence stages
Source: PeerJ journal article supplement (doi:10.7717/peerj.18451), 2025-01-29
Supplement: Table_S4.xlsx [file Table_S4.xlsx]

## Sheet: Sheet1
	Supplementary information, Table S4. Clinical characteristics of SARS-CoV-2 infections and healthy donors recruited in this study.
	Characteristics	Healthy (n=4)	Asymptomatic(n=4)	Symptomatic(n=6)
	Demographics
	Gender, no./total no. (%)
	Male	0/4 (0)	1/4 (25)	1/6 (16.7)
	Female	4/4 (100)	3/4 (75)	5/6 (83.3)
	Age, media (IQR)	50.50 (47.50-53.75)	50.00 (43.75-59.50)	67.0 (57.50-70.50)
	BMI, media (IQR)	26.97(25.03-28.17)	24.61 (22.45-26.83)	24.33 (19.39-26.08)
	Comorbidities
	Hypertension	N/A	N/A	3/6(50)
	Cardiovascular disease	N/A	1/4(25)	1/6(16.7)
	Diabetes	N/A	N/A	1/6(16.7)
	Hyperlipidemia	N/A	N/A	N/A
	Malignancy	N/A	N/A	N/A
	Cerebrovascular disease	N/A	N/A	N/A
	Chronic obstructive pulmonary disease	N/A	1/4(25)	N/A
	Asthma	N/A	N/A	N/A
	Chronic renal disease	N/A	N/A	N/A
	Chronic liver disease	N/A	N/A	N/A
	HIV/AIDS	N/A	N/A	N/A
